# Supplementary material
Source: PubMed Central journal article supplement (PMC5869125)
Supplement: NIHMS925881-supplement-supplement_1.pdf [file NIHMS925881-supplement-supplement_1.pdf]

**Figure 1.** Forest plots of odds ratios and 99% confidence intervals for risk of outcomes of interest at age 10 years associated with left-hand preference (left panels) and mixed hand preference (right panels) relative to children with right-hand preference.

**Part A:** Odds of z scores  $\leq -2$  on each DAS-II, OWLS, WIAT-III, and NEPSY-II assessment.

**Part B:** Odds of positive screens for behavior problems on the CSI-4 and for an ASD diagnosis at age 10 years.

Analyses were adjusted for mother's age  $< 21$  years at delivery, gestational age category 23–24 weeks, birth weight Z-score  $< -2$ , and male sex. Large black dots indicate that the odds ratios are significantly  $> 1$  ( $p < 0.01$ ), as does the lower bound of the confidence interval to the right of the vertical line.

**Online Figure 2.** Forest plots of odds ratios and 99% confidence intervals for the odds of z scores  $\leq -2$  on each DAS-II, OWLS, WIAT-III, and NEPSY-II assessment at age 10 years associated with left-hand preference (left panel) and mixed hand preference (right panel) relative to children with right-hand preference, excluding children with manual limitations.

Analyses were adjusted for mother's age  $< 21$  years at delivery, gestational age category 23–24 weeks, birth weight Z-score  $< -2$ , and male sex. Large black dots indicate that the odds ratios are significantly  $> 1$  ( $p < 0.01$ ), as does the lower bound of the confidence interval to the right of the vertical line. This sample excludes children with MACS level 3 or above.

**Online Table 1.** Sample characteristics of left, mixed, and right-handed preference groups.

|                                  |                    | Handedness Classification<br>(Column %) |                        |                         | Row<br>N |
|----------------------------------|--------------------|-----------------------------------------|------------------------|-------------------------|----------|
|                                  |                    | <i>Left</i><br>n = 145                  | <i>Mixed</i><br>n = 49 | <i>Right</i><br>n = 670 |          |
| <b>Maternal characteristics</b>  |                    |                                         |                        |                         |          |
| Racial identity                  | White              | 70                                      | 57                     | 63                      | 551      |
|                                  | Black              | 24                                      | 30                     | 25                      | 214      |
|                                  | Other              | 8                                       | 13                     | 12                      | 97       |
| Hispanic                         | Yes                | 6                                       | 10                     | 10                      | 84       |
| Age at birth, years              | < 21               | 14                                      | 8                      | 13                      | 111      |
|                                  | 21-35              | 68                                      | 73                     | 66                      | 575      |
|                                  | > 35               | 19                                      | 18                     | 21                      | 178      |
| Education, years                 | ≤ 12 (high school) | 42                                      | 51                     | 40                      | 353      |
|                                  | > 12, < 16         | 23                                      | 18                     | 24                      | 203      |
|                                  | ≥ 16 (≥college)    | 35                                      | 31                     | 37                      | 308      |
| Single marital status            | Yes                | 37                                      | 51                     | 39                      | 341      |
| Public insurance                 | Yes                | 39                                      | 43                     | 32                      | 297      |
| <b>Newborn characteristics</b>   |                    |                                         |                        |                         |          |
| Sex                              | Male               | 57                                      | 57                     | 49                      | 437      |
| Gestational age (weeks)          | 23-24              | 29                                      | 27                     | 17                      | 171      |
|                                  | 25-26              | 40                                      | 45                     | 47                      | 393      |
|                                  | 27                 | 31                                      | 29                     | 36                      | 300      |
| Birth weight, grams              | ≤ 750              | 40                                      | 45                     | 35                      | 313      |
|                                  | 751-1000           | 40                                      | 35                     | 45                      | 378      |
|                                  | > 1000             | 20                                      | 20                     | 20                      | 173      |
| Birth weight Z-score             | < -2               | 2                                       | 8                      | 7                       | 51       |
|                                  | ≥ -2, < -1         | 14                                      | 12                     | 14                      | 117      |
|                                  | ≥ -1               | 84                                      | 80                     | 80                      | 696      |
| Birth head circumference Z-score | < -2               | 8                                       | 4                      | 9                       | 69       |
|                                  | -2, < -1           | 22                                      | 15                     | 22                      | 181      |
|                                  | ≥ -1               | 70                                      | 80                     | 69                      | 580      |

**Online Table 2.** Proportion of children scoring low on measures of cognition, academic achievement, and motor function according to handedness.

|                                                                 | Z-score<br>or value | Handedness Classification<br>(Column %) |                 |                  | Row N |
|-----------------------------------------------------------------|---------------------|-----------------------------------------|-----------------|------------------|-------|
|                                                                 |                     | Left<br>n = 145                         | Mixed<br>n = 49 | Right<br>n = 670 |       |
| <b>General Cognitive Ability</b>                                |                     |                                         |                 |                  |       |
| DAS-II Verbal Reasoning                                         | ≤ -2                | 19                                      | 33              | 13               | 127   |
|                                                                 | > -2, ≤ -1          | 22                                      | 15              | 19               | 163   |
| DAS-II Nonverbal Reasoning                                      | ≤ -2                | 17                                      | 31              | 10               | 107   |
|                                                                 | > -2, ≤ -1          | 26                                      | 24              | 25               | 213   |
| <b>Attention, Inhibitory Control, and Cognitive Flexibility</b> |                     |                                         |                 |                  |       |
| DAS-II Working Memory                                           | ≤ -2                | 22                                      | 30              | 13               | 133   |
|                                                                 | > -2, ≤ -1          | 20                                      | 24              | 17               | 153   |
| NEPSY-II Auditory Attention                                     | ≤ -2                | 25                                      | 40              | 18               | 168   |
|                                                                 | > -2, ≤ -1          | 18                                      | 23              | 22               | 177   |
| NEPSY-II Auditory Response Set                                  | ≤ -2                | 22                                      | 35              | 16               | 147   |
|                                                                 | > -2, ≤ -1          | 33                                      | 30              | 27               | 235   |
| NEPSY-II Inhibition-Inhibition                                  | ≤ -2                | 37                                      | 36              | 34               | 265   |
|                                                                 | > -2, ≤ -1          | 24                                      | 22              | 24               | 199   |
| NEPSY-II Inhibition-Switching                                   | ≤ -2                | 30                                      | 45              | 23               | 208   |
|                                                                 | > -2, ≤ -1          | 29                                      | 23              | 30               | 243   |
| NEPSY-II Animal Sorting                                         | ≤ -2                | 29                                      | 48              | 25               | 224   |
|                                                                 | > -2, ≤ -1          | 36                                      | 18              | 31               | 263   |
| <b>Speed of Processing</b>                                      |                     |                                         |                 |                  |       |
| NEPSY-II Inhibition Naming                                      | ≤ -2                | 34                                      | 47              | 27               | 245   |
|                                                                 | > -2, ≤ -1          | 18                                      | 20              | 21               | 171   |
| <b>Language</b>                                                 |                     |                                         |                 |                  |       |
| OWLS Listening Comprehension                                    | ≤ -2                | 20                                      | 34              | 15               | 139   |
|                                                                 | > -2, ≤ -1          | 28                                      | 25              | 28               | 231   |
| OWLS Oral Expression                                            | ≤ -2                | 23                                      | 36              | 15               | 143   |
|                                                                 | > -2, ≤ -1          | 22                                      | 23              | 23               | 190   |
| <b>Visual-Spatial Processing</b>                                |                     |                                         |                 |                  |       |
| NEPSY-II Geometric Puzzles                                      | ≤ -2                | 23                                      | 33              | 11               | 121   |
|                                                                 | > -2, ≤ -1          | 21                                      | 18              | 24               | 192   |
| <b>Academic Achievement</b>                                     |                     |                                         |                 |                  |       |
| WIAT-III Word Reading                                           | ≤ -2                | 13                                      | 22              | 9                | 89    |
|                                                                 | > -2, ≤ -1          | 22                                      | 26              | 16               | 148   |
| WIAT-III Pseudoword Decoding                                    | ≤ -2                | 15                                      | 30              | 11               | 108   |
|                                                                 | > -2, ≤ -1          | 19                                      | 17              | 17               | 145   |
| WIAT-III Spelling                                               | ≤ -2                | 26                                      | 30              | 13               | 78    |
|                                                                 | > -2, ≤ -1          | 26                                      | 26              | 23               | 135   |
| WIAT-III Numeric Operations                                     | ≤ -2                | 11                                      | 26              | 8                | 123   |
|                                                                 | > -2, ≤ -1          | 24                                      | 20              | 14               | 199   |
| Individual education plan                                       | Yes                 | 62                                      | 73              | 49               | 453   |
| Repeated a grade                                                | Yes                 | 23                                      | 24              | 18               | 164   |
| Special placement                                               | Yes                 | 24                                      | 29              | 17               | 163   |
| <b>Motor Skills</b>                                             |                     |                                         |                 |                  |       |
| NEPSY-II Visuomotor Precision                                   | ≤ -2                | 26                                      | 35              | 16               | 157   |
|                                                                 | > -2, ≤ -1          | 41                                      | 28              | 35               | 301   |
| Manual Ability Classification System                            | Level 1             | 68                                      | 55              | 81               | 669   |
|                                                                 | Level 2             | 20                                      | 24              | 13               | 131   |
|                                                                 | Level ≥ 3           | 12                                      | 20              | 6                | 64    |
| Gross Motor Function Classification System                      | Level ≥ 3           | 3                                       | 10              | 2                | 24    |

Values are **column** percents.

**Online Table 3.** Proportion of children with positive screens and diagnoses for behavioral disorders according to handedness.

|                                           | Handedness Classification<br>(Column %) |                               |                                | Row <i>n</i> |
|-------------------------------------------|-----------------------------------------|-------------------------------|--------------------------------|--------------|
|                                           | <i>Left</i><br><i>n = 145</i>           | <i>Mixed</i><br><i>n = 49</i> | <i>Right</i><br><i>n = 670</i> |              |
| <i>Autism spectrum disorder</i>           |                                         |                               |                                |              |
| Clinical diagnosis of ASD                 | 8                                       | 20                            | 6                              | 57           |
| <b><i>Behavioral problems (CSI-4)</i></b> |                                         |                               |                                |              |
| ADHD inattentive                          | 17                                      | 27                            | 16                             | 97           |
| ADHD hyperactive/ impulsive               | 8                                       | 15                            | 9                              | 32           |
| ADHD combined type                        | 6                                       | 10                            | 5                              | 48           |
| Oppositional defiant                      | 7                                       | 13                            | 9                              | 73           |
| Conduct disorder                          | 3                                       | 4                             | 4                              | 33           |
| Generalized anxiety                       | 6                                       | 13                            | 5                              | 49           |
| Motion tics                               | 13                                      | 23                            | 12                             | 108          |
| Vocal tics                                | 17                                      | 25                            | 16                             | 145          |
| Major depression                          | 2                                       | 4                             | 0.5                            | 8            |
| Dysthymic disorder                        | 3                                       | 10                            | 4                              | 34           |
| Social phobia                             | 2                                       | 6                             | 5                              | 41           |
| Separation anxiety                        | 1                                       | 4                             | 3                              | 26           |
| Enuresis                                  | 16                                      | 17                            | 12                             | 110          |
| Encopresis                                | 10                                      | 13                            | 7                              | 65           |

CSI-4: Child Symptom Inventory-4 Parent Checklist.
